# Supplementary material for: A novel Escherichia coli cell–based bioreporter for quantification of salicylic acid in cosmetics
Source: Springer Nature journal article supplement (doi:10.1007/s00253-024-13006-8), 2024-01-19

Supplementary materials for Applied Microbiology and Biotechnology titled as:

**A novel *Escherichia coli* cell-based bioreporter for quantification of salicylic acid in cosmetics**

Yeonhong Kim <sup>1</sup>, Yangwon Jeon <sup>1</sup>, Geupil Jang <sup>2</sup>, Bong-Gyu Kim <sup>2</sup> and Youngdae Yoon <sup>1,\*</sup>

<sup>1</sup> Department of Environmental Health Science, Konkuk University, Seoul 05029, Republic of Korea

<sup>2</sup> School of Biological Sciences and Technology, Chonnam National University, Gwangju 61186, Republic of Korea

<sup>3</sup> Division of Environmental and Forest Science, Gyeongsang National University, Jinju, 52725, Republic of Korea

**\*Corresponding author:**

Youngdae Yoon

Tel: +82-2-450-0443

Fax: +82-2-450-3726

E-mail: yyoon21@gmail.com

**Figure S1. The responses of biosensor, *Escherichia coli* BL21 WT harboring pMarO-eGFP (SA1), toward salicylic acid.** The eGFP signals were indicated as arbitrary units. Asterisks indicate significant difference in data compared with control (\* $P \leq 0.05$ , \*\* $P \leq 0.01$ , \*\*\* $P \leq 0.001$  using the Dunnett's test).

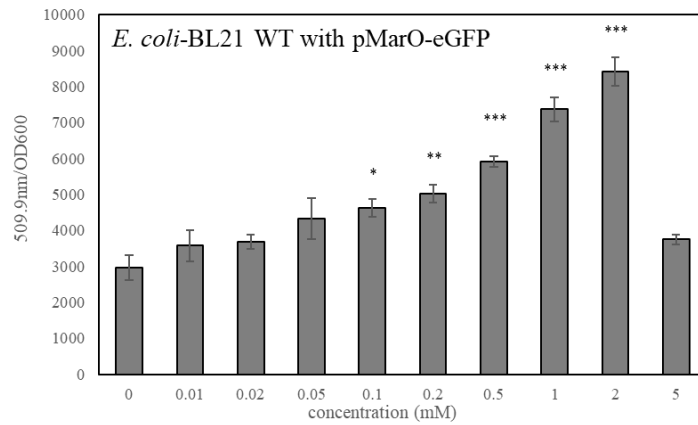

**Figure S2. The fluorescence signals of standard curve indicated as arbitrary units.** Responses of biosensor SA2 exposed to 0–5 mM of salicylic acid for 2 h after 10  $\mu$ M of IPTG treatment. The data were obtained from more than three experiments. The standard deviation is indicated as error bars.

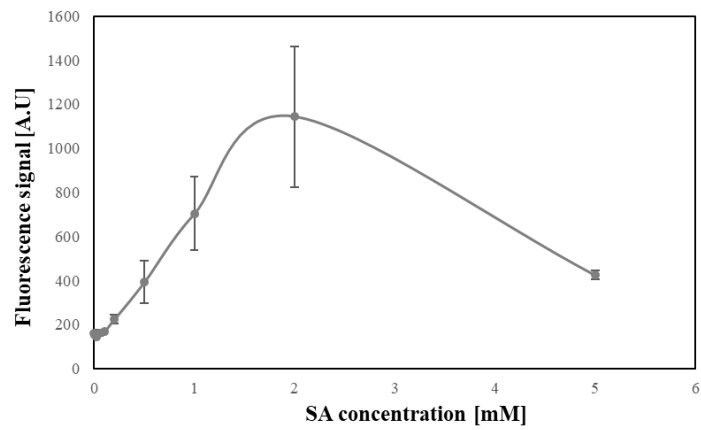

Supplement: MOESM1 [file 253_2024_13006_MOESM1_ESM.pdf]
